# Supplementary material for: Four-Dimensional Superimposition Techniques to Compose Dental Dynamic Virtual Patients: A Systematic Review
Source: MDPI journal article supplement (doi:10.3390/jfb14010033), 2023-01-06
Supplement: s1 [file s1]

Round 1

17 Included articles conducted  
550 snowball papers

screening titles and abstracts

Excluded **533** papers  
Excluded reasons:  
Non-English papers: 2  
Included before: 13  
Non-dental: 29  
Non-dynamic: 46  
Single data: 60  
reviews: 70  
No virtual patient built: 313

Screened snowball papers  
N = 17

screening full-text

Round 2

17 Included snowball articles  
conducted  
410 snowball papers

screening titles and abstracts

Excluded **406** papers  
Excluded reasons:  
Non-English papers: 2  
Included before: 6  
Non-dental: 13  
Single data: 28  
Non-dynamic: 39  
reviews: 59  
No virtual patient built: 259

Screened snowball papers  
N = 4

screening full-text

Round 3

4 Included snowball articles  
conducted  
87 snowball papers

screening titles and abstracts

Excluded **84** papers  
Excluded reasons:  
Non-dynamic: 2  
Included before: 5  
reviews: 7  
No virtual patient built: 70

Screened snowball papers  
N = 3

screening full-text

Round 4

3 Included snowball articles  
conducted  
94 snowball papers

screening titles and abstracts

Excluded **94** papers  
Excluded reasons:  
Non-dynamic: n=1  
reviews: 3  
No virtual patient built: 90

Screened snowball papers  
N = 0

Discussion

23 Included snowball articles after  
three rounds of screening

Discussion between 3 reviewers

Excluded **9** papers  
Excluded reasons:  
Non-dynamic: 4  
Single data: 2  
No virtual patient built: 3

14 final Included snowball articles
