# Supplementary material for: Four-Dimensional Superimposition Techniques to Compose Dental Dynamic Virtual Patients: A Systematic Review
Source: MDPI journal article supplement (doi:10.3390/jfb14010033), 2023-01-06
Supplement: s1 [file s1]

**Table S2.** Joanna Briggs Institute Critical Appraisal Checklist for Quasi-Experimental Studies (non-randomized experimental studies)

| Question                                                                                                                                     | Answer (Yes $\textcircled{Y}$ , No $\textcircled{N}$ , Unclear $\textcircled{U}$ , or not applicable $\textcircled{X}$ ) |
|----------------------------------------------------------------------------------------------------------------------------------------------|--------------------------------------------------------------------------------------------------------------------------|
| Q1. Is it clear in the study what is the "cause" and what is the 'effect' (i.e., there is no confusion about which variable comes first)?    |                                                                                                                          |
| Q2. Were the participants included in any similar comparisons?                                                                               |                                                                                                                          |
| Q3. Were the participants included in any comparisons receiving similar treatment/care other than the exposure or intervention of interest?+ |                                                                                                                          |
| Q4. Was there a control group?                                                                                                               |                                                                                                                          |
| Q5. Were there multiple measurements of the outcome both before and after the intervention/exposure?                                         |                                                                                                                          |
| Q6. Was follow up complete and if not, were differences between groups in terms of their follow up adequately described and analyzed?        |                                                                                                                          |
| Q7. Were the outcomes of participants included in any comparisons measured in the same way?                                                  |                                                                                                                          |
| Q8. Were outcomes measured in a reliable way?                                                                                                |                                                                                                                          |
| Q9. Was appropriate statistical analysis used?                                                                                               |                                                                                                                          |

| Non-randomized experimental studies | Q1                | Q2                | Q3 +              | Q4                | Q5                | Q6                | Q7                | Q8                | Q9                | Percentage of yes | Risk of Bias* |
|-------------------------------------|-------------------|-------------------|-------------------|-------------------|-------------------|-------------------|-------------------|-------------------|-------------------|-------------------|---------------|
| Li J[19]<br>/2022                   | $\textcircled{Y}$ | $\textcircled{Y}$ | $\textcircled{N}$ | $\textcircled{Y}$ | $\textcircled{X}$ | $\textcircled{X}$ | $\textcircled{Y}$ | $\textcircled{Y}$ | $\textcircled{Y}$ | 77.8%             | mode rate     |
| Kim SH[25]<br>/2020                 | $\textcircled{Y}$ | $\textcircled{Y}$ | $\textcircled{N}$ | $\textcircled{Y}$ | $\textcircled{X}$ | $\textcircled{X}$ | $\textcircled{Y}$ | $\textcircled{Y}$ | $\textcircled{Y}$ | 77.8%             | mode rate     |
| Lee SJ[26]<br>/2019                 | $\textcircled{Y}$ | $\textcircled{Y}$ | $\textcircled{N}$ | $\textcircled{Y}$ | $\textcircled{X}$ | $\textcircled{X}$ | $\textcircled{Y}$ | $\textcircled{Y}$ | $\textcircled{Y}$ | 77.8%             | mode rate     |
| Olszewski R[29]<br>/2008            | $\textcircled{Y}$ | $\textcircled{U}$ | $\textcircled{U}$ | $\textcircled{Y}$ | $\textcircled{X}$ | $\textcircled{X}$ | $\textcircled{Y}$ | $\textcircled{Y}$ | $\textcircled{Y}$ | 55.6%             | substantial   |
| Fushima K[18]<br>/2007              | $\textcircled{Y}$ | $\textcircled{U}$ | $\textcircled{N}$ | $\textcircled{Y}$ | $\textcircled{X}$ | $\textcircled{X}$ | $\textcircled{Y}$ | $\textcircled{Y}$ | $\textcircled{Y}$ | 66.7%             | mode rate     |
| Lam WYH[32]<br>/2016                | $\textcircled{Y}$ | $\textcircled{Y}$ | $\textcircled{N}$ | $\textcircled{Y}$ | $\textcircled{X}$ | $\textcircled{X}$ | $\textcircled{Y}$ | $\textcircled{Y}$ | $\textcircled{U}$ | 66.7%             | mode rate     |
| Lam WYH[33]<br>/2018                | $\textcircled{Y}$ | $\textcircled{Y}$ | $\textcircled{N}$ | $\textcircled{Y}$ | $\textcircled{X}$ | $\textcircled{X}$ | $\textcircled{Y}$ | $\textcircled{Y}$ | $\textcircled{U}$ | 66.7%             | mode rate     |
| He S[35]<br>/2016                   | $\textcircled{Y}$ | $\textcircled{Y}$ | $\textcircled{N}$ | $\textcircled{Y}$ | $\textcircled{X}$ | $\textcircled{X}$ | $\textcircled{Y}$ | $\textcircled{Y}$ | $\textcircled{U}$ | 66.7%             | mode rate     |
| Amezua X[37]<br>/2021               | $\textcircled{Y}$ | $\textcircled{Y}$ | $\textcircled{N}$ | $\textcircled{Y}$ | $\textcircled{X}$ | $\textcircled{X}$ | $\textcircled{Y}$ | $\textcircled{Y}$ | $\textcircled{Y}$ | 77.8%             | mode rate     |
| Savoldelli C[39]<br>/2012           | $\textcircled{Y}$ | $\textcircled{Y}$ | $\textcircled{N}$ | $\textcircled{Y}$ | $\textcircled{X}$ | $\textcircled{X}$ | $\textcircled{Y}$ | $\textcircled{Y}$ | $\textcircled{U}$ | 66.7%             | mode rate     |

+ It represents high risk when the answer to Q3 is yes. Therefore, the yes and no of Q3 are swapped when calculating percentage of yes.

\* 0%-39% may represent a high risk of bias; 40%-59% may represent a substantial risk of bias; 60%-79% may represent a moderate risk of bias; 80%-100% may represent a low risk of bias.

**Table S3.** Joanna Briggs Institute Critical Appraisal Checklist for case reports

| Question                                                                                 | Answer (Yes $\textcircled{Y}$ , No $\textcircled{N}$ , Unclear $\textcircled{U}$ , or not applicable $\textcircled{X}$ ) |
|------------------------------------------------------------------------------------------|--------------------------------------------------------------------------------------------------------------------------|
| Q1. Were patient's demographic characteristics clearly described?                        |                                                                                                                          |
| Q2. Was the patient's history clearly described and presented as a timeline?             |                                                                                                                          |
| Q3. Was the current clinical condition of the patient on presentation clearly described? |                                                                                                                          |
| Q4. Were diagnostic tests or assessment methods and the results clearly described?       |                                                                                                                          |
| Q5. Was the intervention(s) or treatment procedure(s) clearly described?                 |                                                                                                                          |
| Q6. Was the post-intervention clinical condition clearly described?                      |                                                                                                                          |
| Q7. Were adverse events (harms) or unanticipated events identified and described?        |                                                                                                                          |
| Q8. Does the case report provide takeaway lessons?                                       |                                                                                                                          |

| Case reports             | Q1                | Q2                | Q3                | Q4                | Q5                | Q6                | Q7                | Q8                | Percentage of yes | Risk of Bias* |
|--------------------------|-------------------|-------------------|-------------------|-------------------|-------------------|-------------------|-------------------|-------------------|-------------------|---------------|
| Zambrana N[20] /2022     | $\textcircled{N}$ | $\textcircled{N}$ | $\textcircled{N}$ | $\textcircled{X}$ | $\textcircled{Y}$ | $\textcircled{Y}$ | $\textcircled{N}$ | $\textcircled{Y}$ | 37.5%             | high          |
| Kim JE[21] /2019         | $\textcircled{N}$ | $\textcircled{N}$ | $\textcircled{N}$ | $\textcircled{X}$ | $\textcircled{Y}$ | $\textcircled{Y}$ | $\textcircled{N}$ | $\textcircled{Y}$ | 37.5%             | high          |
| Revilla-Leon M[22] /2022 | $\textcircled{N}$ | $\textcircled{N}$ | $\textcircled{N}$ | $\textcircled{X}$ | $\textcircled{Y}$ | $\textcircled{Y}$ | $\textcircled{N}$ | $\textcircled{Y}$ | 37.5%             | high          |
| Revilla-Leon M[23] /2022 | $\textcircled{N}$ | $\textcircled{N}$ | $\textcircled{N}$ | $\textcircled{X}$ | $\textcircled{Y}$ | $\textcircled{Y}$ | $\textcircled{N}$ | $\textcircled{Y}$ | 37.5%             | high          |
| Lepidi L[24] /2021       | $\textcircled{N}$ | $\textcircled{N}$ | $\textcircled{Y}$ | $\textcircled{X}$ | $\textcircled{Y}$ | $\textcircled{Y}$ | $\textcircled{N}$ | $\textcircled{Y}$ | 50%               | substantial   |
| Li J[27] /2020           | $\textcircled{Y}$ | $\textcircled{N}$ | $\textcircled{Y}$ | $\textcircled{X}$ | $\textcircled{Y}$ | $\textcircled{Y}$ | $\textcircled{N}$ | $\textcircled{Y}$ | 62.5%             | moderate      |
| Li J[28] /2021           | $\textcircled{N}$ | $\textcircled{N}$ | $\textcircled{N}$ | $\textcircled{X}$ | $\textcircled{Y}$ | $\textcircled{Y}$ | $\textcircled{N}$ | $\textcircled{Y}$ | 37.5%             | high          |
| Kois JC[30] /2022        | $\textcircled{N}$ | $\textcircled{N}$ | $\textcircled{N}$ | $\textcircled{X}$ | $\textcircled{Y}$ | $\textcircled{Y}$ | $\textcircled{N}$ | $\textcircled{Y}$ | 37.5%             | high          |
| Kwon JH[31] /2019        | $\textcircled{N}$ | $\textcircled{N}$ | $\textcircled{N}$ | $\textcircled{X}$ | $\textcircled{Y}$ | $\textcircled{Y}$ | $\textcircled{N}$ | $\textcircled{Y}$ | 37.5%             | high          |
| Shao J[34] /2019         | $\textcircled{Y}$ | $\textcircled{N}$ | $\textcircled{Y}$ | $\textcircled{Y}$ | $\textcircled{Y}$ | $\textcircled{Y}$ | $\textcircled{N}$ | $\textcircled{Y}$ | 75%               | moderate      |
| Park JH[36] /2021        | $\textcircled{Y}$ | $\textcircled{N}$ | $\textcircled{Y}$ | $\textcircled{Y}$ | $\textcircled{Y}$ | $\textcircled{Y}$ | $\textcircled{N}$ | $\textcircled{Y}$ | 75%               | moderate      |
| Dai F[38] /2016          | $\textcircled{Y}$ | $\textcircled{N}$ | $\textcircled{Y}$ | $\textcircled{X}$ | $\textcircled{Y}$ | $\textcircled{Y}$ | $\textcircled{N}$ | $\textcircled{Y}$ | 62.5%             | moderate      |
| Terajima M[4] /2008      | $\textcircled{Y}$ | $\textcircled{Y}$ | $\textcircled{Y}$ | $\textcircled{Y}$ | $\textcircled{Y}$ | $\textcircled{Y}$ | $\textcircled{N}$ | $\textcircled{Y}$ | 87.5%             | low           |
| Perez-Giugovaz MG[40]    | $\textcircled{N}$ | $\textcircled{N}$ | $\textcircled{N}$ | $\textcircled{X}$ | $\textcircled{Y}$ | $\textcircled{Y}$ | $\textcircled{N}$ | $\textcircled{Y}$ | 37.5%             | high          |

|                             |   |   |   |   |   |   |   |   |       |             |
|-----------------------------|---|---|---|---|---|---|---|---|-------|-------------|
| /2021                       |   |   |   |   |   |   |   |   |       |             |
| Solaberrieta E[41]<br>/2015 | Ⓝ | Ⓝ | Ⓝ | ⓧ | Ⓨ | Ⓨ | Ⓝ | Ⓨ | 37.5% | high        |
| Granata S[42]<br>/2020      | Ⓝ | Ⓝ | Ⓨ | Ⓨ | Ⓨ | Ⓨ | Ⓝ | Ⓨ | 62.5% | moderate    |
| Noguchi N[43]<br>/2007      | Ⓝ | Ⓝ | Ⓨ | ⓧ | Ⓨ | Ⓨ | Ⓝ | Ⓨ | 50%   | substantial |

\* 0%-39% may represent a high risk of bias; 40%-59% may represent a substantial risk of bias; 60%-79% may represent a moderate risk of bias; 80%-100% may represent a low risk of bias.
